# Supplementary material for: Parathyroid hormone may play a role in the pathophysiology of primary hypertension
Source: PubMed Central journal article supplement — Endocr Connect. 2020 Dec 3;10(1):54–65. doi: 10.1530/EC-20-0446 (PMC7923049; doi:10.1530/ec-20-0446), 2020-12-03
Supplement: supplementary_table_1.pdf [file supplementary_table_1.pdf]

**Supplemental table 1.** Number of subjects using specific medications.

| <b>Medication</b>                                      | <b>n</b> |
|--------------------------------------------------------|----------|
| Female hormones (contraception or replacement therapy) | 77       |
| SSRI or SNRI                                           | 34       |
| Levothyroxine                                          | 22       |
| Inhaled glucocorticoid                                 | 16       |
| Antihistamine                                          | 15       |
| Statin                                                 | 13       |
| Proton pump inhibitor                                  | 12       |
| NSAID                                                  | 9        |
| Glucosamine                                            | 6        |
| Amitriptyline                                          | 5        |
| Benzodiazepine                                         | 5        |
| Coxib                                                  | 3        |
| Mirtazapine                                            | 2        |
| Antiepileptic                                          | 2        |
| Ezetimibe                                              | 1        |
| Cholestyramine                                         | 1        |
| Liothyronine                                           | 1        |
| Quetiapine                                             | 1        |
| Adalimumab                                             | 1        |
| Tamoxifen                                              | 1        |
| Dihydroepiandrosterone                                 | 1        |
| Isotretionine                                          | 1        |
| Azathioprine                                           | 1        |
| Mesalazine                                             | 1        |
| Sulphasalazine                                         | 1        |
| Alendronate                                            | 1        |
| Total                                                  | 234      |

SSRI, selective serotonin reuptake inhibitor; SNRI, serotonin-noradrenaline reuptake inhibitor; NSAID, non-steroidal anti-inflammatory drug.
